# Supplementary material
Source: publisher site journal article supplement (https://www.degruyterbrill.com/publication/isbn/9783110446067/downloadAsset/9783110446067_Further_readings_5.pdf)
Supplement: Supplementary file 1 [file 9783110446067_Further_readings_5.pdf]

# Further Reading

## Chapter 1

Barroso, L. and U. Hölzle [2007]. “The case for energy-proportional computing,” *IEEE Computer*, December.

*A plea to change the nature of computer components so that they use much less power when lightly utilized.*

Bell, C. G. [1996]. *Computer Pioneers and Pioneer Computers*, ACM and the Computer Museum, videotapes.

*Two videotapes on the history of computing, produced by Gordon and Gwen Bell, including the following machines and their inventors: Harvard Mark-I, ENIAC, EDSAC, IAS machine, and many others.*

Burks, A. W., H. H. Goldstine, and J. von Neumann [1946]. “Preliminary discussion of the logical design of an electronic computing instrument,” Report to the U.S. Army Ordnance Department, p. 1; also appears in *Papers of John von Neumann*, W. Aspray and A. Burks (Eds.), MIT Press, Cambridge, MA, and Tomash Publishers, Los Angeles, 1987, 97–146.

*A classic paper explaining computer hardware and software before the first stored-program computer was built. We quote extensively from it in [Chapter 3](#). It simultaneously explained computers to the world and was a source of controversy because the first draft did not give credit to Eckert and Mauchly.*

Campbell-Kelly, M. and W. Aspray [1996]. *Computer: A History of the Information Machine*, Basic Books, New York.

*Two historians chronicle the dramatic story. The New York Times calls it well written and authoritative.*

Ceruzzi, P. F. [1998]. *A History of Modern Computing*, MIT Press, Cambridge, MA. *Contains a good description of the later history of computing: the integrated circuit and its impact, personal computers, UNIX, and the Internet.*

Curnow, H. J. and B. A. Wichmann [1976]. “A synthetic benchmark,” *The Computer J.* 19 (1):80.

*Describes the first major synthetic benchmark, Whetstone, and how it was created.*

Flemming, P. J. and J. J. Wallace [1986]. “How not to lie with statistics: The correct way to summarize benchmark results,” *Comm. ACM* 29:3 (March), 218–21.

*Describes some of the underlying principles in using different means to summarize performance results.*

Goldstine, H. H. [1972]. *The Computer: From Pascal to von Neumann*, Princeton University Press, Princeton, NJ.

*A personal view of computing by one of the pioneers who worked with von Neumann.*

Hayes, B. [2007]. “Computing in a parallel universe,” *American Scientist*, Vol. 95 (November–December), 476–480.

*An overview of the parallel computing challenge written for the layman.*

Hennessy, J. L. and D. A. Patterson [2012]. **Chapter 1** of *Computer Architecture: A Quantitative Approach*, fifth edition, Morgan Kaufmann Publishers, Waltham, MA.

**Section 1.5** goes into more detail on power, **Section 1.6** contains much more detail on the cost of integrated circuits and explains the reasons for the difference between price and cost, and **Section 1.8** gives more details on evaluating performance.

Lampson, B. W. [1986]. “Personal distributed computing; The Alto and Ethernet software.” In ACM Conference on the History of Personal Workstations (January).

Thacker, C R. [1986]. “Personal distributed computing; The Alto and Ethernet hardware,” In ACM Conference on the History of Personal Workstations (January).

*These two papers describe the software and hardware of the landmark Alto.*

Metropolis, N., J. Howlett, and G.-C. Rota (Eds.) [1980]. *A History of Computing in the Twentieth Century*, Academic Press, New York.

*A collection of essays that describe the people, software, computers, and laboratories involved in the first experimental and commercial computers. Most of the authors were personally involved in the projects. An excellent bibliography of early reports concludes this interesting book.*

Public Broadcasting System [1992]. *The Machine That Changed the World*, videotapes.

*These five one-hour programs include rare footage and interviews with pioneers of the computer industry.*

Slater, R. [1987]. *Portraits in Silicon*, MIT Press, Cambridge, MA.

*Short biographies of 31 computer pioneers.*

Stern, N. [1980]. “Who invented the first electronic digital computer?” *Annals of the History of Computing* 2:4 (October), 375–76.

*A historian’s perspective on Atanasoff versus Eckert and Mauchly.*

Wilkes, M. V. [1985]. *Memoirs of a Computer Pioneer*, MIT Press, Cambridge, MA.

*A personal view of computing by one of the pioneers.*

## Chapter 2

Bayko, J. [1996]. “Great microprocessors of the past and present,” search for it on the [www.jbayko.sasktelwebsite.net/cpu.html](http://www.jbayko.sasktelwebsite.net/cpu.html)

*A personal view of the history of both representative and unusual microprocessors, from the Intel 4004 to the Patriot Scientific ShBoom!*

Kane, G. and J. Heinrich [1992]. *MIPS RISC Architecture*, Prentice Hall, Englewood Cliffs, NJ.

*This book describes the MIPS architecture in greater detail than [Appendix A](#).*

Levy, H. and R. Eckhouse [1989]. *Computer Programming and Architecture: The VAX*, Digital Press, Boston.

*This book concentrates on the VAX, but also includes descriptions of the Intel 8086, IBM 360, and CDC 6600.*

Morse, S., B. Ravenal, S. Mazor, and W. Pohlman [1980]. “Intel microprocessors—8080 to 8086,” *Computer* 13:10 (October).

*The architecture history of the Intel from the 4004 to the 8086, according to the people who participated in the designs.*

Wakerly, J. [1989]. *Microcomputer Architecture and Programming*, Wiley, New York.

*The Motorola 6800 is the main focus of the book, but it covers the Intel 8086, Motorola 6809, TI 9900, and Zilog Z8000.*

## Chapter 3

If you are interested in learning more about floating point, two publications by David Goldberg [1991, 2002] are good starting points; they abound with pointers to further reading. Several of the stories told on the CD come from Kahan [1972, 1983]. The latest word on the state of the art in computer arithmetic is often found in the *Proceedings* of the latest IEEE-sponsored Symposium on Computer Arithmetic, held every two years; the 16th was held in 2003.

Burks, A. W., H. H. Goldstine, and J. von Neumann [1946]. “Preliminary discussion of the logical design of an electronic computing instrument,” *Report to the U.S. Army Ordnance Dept.*, p. 1; also in *Papers of John von Neumann*, W. Aspray and A. Burks (Eds.), MIT Press, Cambridge, MA, and Tomash Publishers, Los Angeles, 1987, 97–146.

*This classic paper includes arguments against floating-point hardware.*

Goldberg, D. [2002]. “Computer arithmetic,” Appendix J of *Computer Architecture: A Quantitative Approach*, fifth edition, J. L. Hennessy and D. A. Patterson, Morgan Kaufmann Publishers, Waltham, MA.

*A more advanced introduction to integer and floating-point arithmetic, with emphasis on hardware. It covers [Sections 3.4–3.6](#) of this book in just 10 pages, leaving another 45 pages for advanced topics.*

Goldberg, D. [1991]. “What every computer scientist should know about floating-point arithmetic,” *ACM Computing Surveys* 23(1) 5–48.

*Another good introduction to floating-point arithmetic by the same author, this time with emphasis on software.*

Kahan, W. [1972]. “A survey of error-analysis,” in *Info. Processing 71* (Proc. IFIP Congress 71 in Ljubljana), Vol. 2, North-Holland Publishing, Amsterdam, 1214–1239.

*This survey is a source of stories on the importance of accurate arithmetic.*

Kahan, W. [1983]. “Mathematics written in sand,” *Proc. Amer. Stat. Assoc. Joint Summer Meetings of 1983, Statistical Computing Section*, 12–26.

*The title refers to silicon and is another source of stories illustrating the importance of accurate arithmetic.*

Kahan, W. [1990]. “On the advantage of the 8087’s stack,” unpublished course notes, Computer Science Division, University of California, Berkeley.

*What the 8087 floating-point architecture could have been.*

Kahan, W. [1997]. Available via a link to Kahan’s homepage at [www.mkp.com/books\\_catalog/cod/links.htm](http://www.mkp.com/books_catalog/cod/links.htm).

*A collection of memos related to floating point, including “Beastly numbers” (another less famous Pentium bug), “Notes on the IEEE floating point arithmetic” (including comments on how some features are atrophying), and “The baleful effects of computing benchmarks” (on the unhealthy preoccupation on speed versus correctness, accuracy, ease of use, flexibility, . . .).*

Koren, I. [2002]. *Computer Arithmetic Algorithms*, second edition, A. K. Peters, Natick, MA.

*A textbook aimed at seniors and first-year graduate students that explains fundamental principles of basic arithmetic, as well as complex operations such as logarithmic and trigonometric functions.*

Wilkes, M. V. [1985]. *Memoirs of a Computer Pioneer*, MIT Press, Cambridge, MA.

*This computer pioneer’s recollections include the derivation of the standard hardware for multiply and divide developed by von Neumann.*

## Chapter 4

Bhandarkar, D. and D. W. Clark [1991]. “Performance from architecture: Comparing a RISC and a CISC with similar hardware organizations,” *Proc. Fourth Conf. on Architectural Support for Programming Languages and Operating Systems*, IEEE/ACM (April), Palo Alto, CA, 310–19.

*A quantitative comparison of RISC and CISC written by scholars who argued for CISCs as well as built them; they conclude that MIPS is between 2 and 4 times faster than a VAX built with similar technology, with a mean of 2.7.*

Fisher, J. A. and B. R. Rau [1993]. *Journal of Supercomputing* (January), Kluwer.

*This entire issue is devoted to the topic of exploiting ILP. It contains papers on both the architecture and software and is a wonderful source for further references.*

Hennessy, J. L. and D. A. Patterson [2012]. *Computer Architecture: A Quantitative Approach*, fifth edition, Morgan Kaufmann, Waltham, MA.

*Chapter 3 and Appendix C go into considerably more detail about pipelined processors (almost 200 pages), including superscalar processors and VLIW processors. Appendix G describes Itanium.*

Jouppi, N. P. and D. W. Wall [1989]. “Available instruction-level parallelism for superscalar and superpipelined processors,” *Proc. Third Conf. on Architectural Support for Programming Languages and Operating Systems*, IEEE/ACM (April), Boston, 272–82.

*A comparison of deeply pipelined (also called superpipelined) and superscalar systems.*

Kogge, P. M. [1981]. *The Architecture of Pipelined Computers*, McGraw-Hill, New York.

*A formal text on pipelined control, with emphasis on underlying principles.*

Russell, R. M. [1978]. “The CRAY-1 computer system,” *Comm. of the ACM* 21:1 (January), 63–72.

*A short summary of a classic computer that uses vectors of operations to remove pipeline stalls.*

Smith, A. and J. Lee [1984]. “Branch prediction strategies and branch target buffer design,” *Computer* 17:1 (January), 6–22.

*An early survey on branch prediction.*

Smith, J. E. and A. R. Plezkun [1988]. “Implementing precise interrupts in pipelined processors,” *IEEE Trans. on Computers* 37:5 (May), 562–73.

*Covers the difficulties in interrupting pipelined computers.*

Thornton, J. E. [1970]. *Design of a Computer: The Control Data 6600*, Glenview, IL: Scott, Foresman.

*A classic book describing a classic computer, considered the first supercomputer.*

## Chapter 5

Cantin, J. F. and M. D. Hill [2001]. “Cache performance for selected SPEC CPU2000 benchmarks,” *SIGARCH Computer Architecture News*, 29:4p (September), 13–18.

*A reference paper of cache miss rates for many cache sizes for the SPEC2000 benchmarks.*

Conti, C. D. H. Gibson, and S. H. Pitowsky [1968]. “Structural aspects of the System/360 Model 85, part I: General organization,” *IBM Systems J.* 7:1, 2–14.

*A classic paper that describes the first commercial computer to use a cache and its resulting performance.*

Hennessy, J. and D. Patterson [2012]. [Chapter 2](#) and [Appendix B](#) in *Computer Architecture: A Quantitative Approach*, fifth edition, Morgan Kaufmann Publishers, Waltham, MA.

*For more in-depth coverage of a variety of topics including protection, cache performance of out-of-order processors, virtually addressed caches, multilevel caches, compiler optimizations, additional latency tolerance mechanisms, and cache coherency.*

Kilburn, T., D. B. G Edwards, M. J. Lanigan, and F. H. Sumner [1962]. “One-level storage system,” *IRE Transactions on Electronic Computers* EC-11 (April), 223–35. Also appears in D. P. Siewiorek, C G Bell, and A. Newell [1982], *Computer Structures: Principles and Examples*, McGraw-Hill, New York, 135–48.

*This classic paper is the first proposal for virtual memory.*

LaMarca, A. and R. E. Ladner [1996]. “The influence of caches on the performance of heaps,” *ACM J. of Experimental Algorithmics*, Vol. 1.

*This paper shows the difference between complexity analysis of an algorithm, instruction count performance, and memory hierarchy for four sorting algorithms.*

McCalpin, J. D. [1995]. “STREAM: Sustainable Memory Bandwidth in High Performance Computers,” [www.cs.virginia.edu/stream](http://www.cs.virginia.edu/stream).

*A widely used microbenchmark that measures the performance of the memory system behind the caches.*

Przybylski, S. A. [1990]. *Cache and Memory Hierarchy Design: A Performance-Directed Approach*, Morgan Kaufmann Publishers, San Francisco.

*A thorough exploration of multilevel memory hierarchies and their performance.*

Ritchie, D. [1984]. “The evolution of the UNIX time-sharing system,” *AT&T Bell Laboratories Technical Journal*, 1984, 1577–93.

*The history of UNIX from one of its inventors.*

Ritchie, D. M. and K. Thompson [1978]. “The UNIX time-sharing system,” *Bell System Technical Journal* (August), 1991–2019.

*A paper describing the most elegant operating system ever invented.*

Silberschatz, A., P. Galvin, and G. Grange [2003]. *Operating System Concepts*, sixth edition, Addison-Wesley, Reading, MA.

*An operating systems textbook with a thorough discussion of virtual memory processes and process management, and protection issues.*

Smith, A. J. [1982]. “Cache memories,” *Computing Surveys* 14:3 (September), 473–530.

*The classic survey paper on caches. This paper defined the terminology for the field and has served as a reference for many computer designers.*

Smith, D. K. and R.C. Alexander. [1988]. *Fumbling the Future: How Xerox Invented, Then Ignored, the First Personal Computer*, Morrow, New York.

*A popular book that explains the role of Xerox PARC in laying the foundation for today's computing, but which Xerox did not substantially benefit from.*

Tanenbaum, A. [2001]. *Modern Operating Systems*, second edition, Upper Saddle River, Prentice Hall, NJ.

*An operating system textbook with a good discussion of virtual memory.*

Wilkes, M. [1965]. "Slave memories and dynamic storage allocation," *IEEE Trans. Electronic Computers* EC-14:2 (April), 270–71.

*The first classic paper on caches.*

## Chapter 6

Almasi, G. S. and A. Gottlieb [1989]. *Highly Parallel Computing*, Benjamin/Cummings, Redwood City, CA.

*A textbook covering parallel computers.*

Amdahl, G. M. [1967]. "Validity of the single processor approach to achieving large scale computing capabilities," *Proc. AFIPS Spring Joint Computer Conf.*, Atlantic City, NJ (April), 483–85.

*Written in response to the claims of the Illiac IV, this three-page article describes Amdahl's law and gives the classic reply to arguments for abandoning the current form of computing.*

Andrews, G. R. [1991]. *Concurrent Programming: Principles and Practice*, Benjamin/Cummings, Redwood City, CA.

*A text that gives the principles of parallel programming.*

Archibald, J. and J.-L. Baer [1986]. "Cache coherence protocols: Evaluation using a multiprocessor simulation model," *ACM Trans. on Computer Systems* 4:4 (November), 273–98.

*Classic survey paper of shared-bus cache coherence protocols.*

Arpaci-Dusseau, A., R. Arpaci-Dusseau, D. Culler, J. Hellerstein, and D. Patterson [1997]. "High-performance sorting on networks of workstations," *Proc. ACM SIGMOD/PODS Conference on Management of Data*, Tucson, AZ (May), 12–15.

*How a world record sort was performed on a cluster, including architecture critique of the workstation and network interface. By April 1, 1997, they pushed the record to 8.6 GB in 1 minute and 2.2 seconds to sort 100 MB.*

Asanovic, K., R. Bodik, B. C. Catanzaro, J. J. Gebis, P. Husbands, K. Keutzer, D. A. Patterson, W. L. Plishker, J. Shalf, S. W. Williams, and K. A. Yelick. [2006].



“The landscape of parallel computing research: A view from Berkeley.” Tech. Rep. UCB/EECS-2006-183, EECS Department, University of California, Berkeley (December 18).

*Nicknamed the “Berkeley View,” this report lays out the landscape of the multicore challenge.*

Bailey, D. H., E. Barszcz, J. T. Barton, D. S. Browning, R. L. Carter, L. Dagum, R. A. Fatoohi, P. O. Frederickson, T. A. Lasinski, R. S. Schreiber, H. D. Simon, V. Venkatakrishnan, and S. K. Weeratunga. [1991]. “The NAS parallel benchmarks—summary and preliminary results,” *Proceedings of the 1991 ACM/IEEE conference on Supercomputing* (August).

*Describes the NAS parallel benchmarks.*

Bell, C. G. [1985]. “Multis: A new class of multiprocessor computers,” *Science* 228 (April 26), 462–67.

*Distinguishes shared address and nonshared address multiprocessors based on micro processors.*

Bienia, C., S. Kumar, J. P. Singh, and K. Li [2008]. “The PARSEC benchmark suite: characterization and architectural implications,” Princeton University Technical Report TR-81 1-008 (January).

*Describes the PARSEC parallel benchmarks. Also see <http://parsec.cs.princeton.edu/>.*

Cooper, B. F., A. Silberstein, E. Tam, R. Ramakrishnan, R. Sears [2010]. Benchmarking cloud serving systems with YCSB, In: *Proceedings of the 1st ACM Symposium on Cloud computing*, Indianapolis, Indiana, USA, doi:10.1145/1807128.1807152 (June).

*Presents the “Yahoo! Cloud Serving Benchmark” (YCSB) framework, with the goal of facilitating performance comparisons of the new generation of cloud data serving systems.*

Culler, D. E. and J. P. Singh, with A. Gupta [1998]. *Parallel Computer Architecture*, Morgan Kaufmann, San Francisco.

*A textbook on parallel computers.*

Dongarra J. J., J. R. Bunch, G. B. Moler, G. W. Stewart [1979]. *LINPACK Users’ Guide*, Society for Industrial Mathematics.

*The original document describing Linpack, which became a widely used parallel benchmark.*

Falk, H. [1976]. “Reaching for the gigaflop,” *IEEE Spectrum* 13:10 (October), 65–70. *Chronicles the sad story of the Illiac IV: four times the cost and less than one-tenth the performance of original goals.*

Flynn, M. J. [1966]. “Very high-speed computing systems,” *Proc. IEEE* 54:12 (December), 1901–09.

*Classic article showing SISD/SIMD/MISD/MIMD classifications.*



Hennessy, J. and D. Patterson [2012]. [Chapters 5](#) and Appendices F and I in *Computer Architecture: A Quantitative Approach*, fifth edition, Morgan Kaufmann Publishers, Waltham, MA.

*A more in-depth coverage of a variety of multiprocessor and cluster topics, including programs and measurements.*

Henning, J. L. [2007]. “SPEC CPU suite growth: an historical perspective,” *Computer Architecture News*, Vol. 35, no. 1 (March).

*Gives the history of SPEC, including the use of SPECrate to measure performance on independent jobs, which is being used as a parallel benchmark.*

Hord, R. M. [1982]. *The Illiac-IV, the First Supercomputer*, Computer Science Press, Rockville, MD.

*A historical accounting of the Illiac IV project.*

Hwang, K. [1993]. *Advanced Computer Architecture with Parallel Programming*, McGraw-Hill, New York.

*Another textbook covering parallel computers.*

Kozyrakis, C and D. Patterson [2003]. “Scalable vector processors for embedded systems,” *IEEE Micro* 23:6 (November–December), 36–45.

*Examination of a vector architecture for the MIPS instruction set in media and signal processing.*

Laprie, J.-C. [1985]. “Dependable computing and fault tolerance: Concepts and terminology,” *15th Annual Int’l Symposium on Fault-Tolerant Computing FTCS 15*, Digest of Papers, Ann Arbor, MI (June19–21) 2–11. *The paper that introduced standard definitions of dependability, reliability, and availability.*

Menabrea, L. F. [1842]. “Sketch of the analytical engine invented by Charles Babbage,” *Bibliothèque Universelle de Genève* (October).

*Certainly the earliest reference on multiprocessors, this mathematician made this comment while translating papers on Babbage’s mechanical computer.*

Patterson, D., G. Gibson, and R. Katz [1988]. “A case for redundant arrays of inexpensive disks (RAID),” *SIGMOD Conference*, 109–16.

Pfister, G. F. [1998]. *In Search of Clusters: The Coming Battle in Lowly Parallel Computing*, second edition, Prentice Hall, Upper Saddle River, NJ.

*An entertaining book that advocates clusters and is critical of NUMA multiprocessors.*

G. Regnier, S. Makineni, R. Illikkal, R. Iyer, D. Minturn, R. Huggahalli, D. Newell, L. Cline, and A. Foong [2004]. TCP onloading for data center servers. *IEEE Computer*, 37(11):48–58.

*Describes the work of researchers at Intel Labs, who have experimented with alternative solutions that improve the server’s ability to process TCP/IP packets efficiently and at very high rates.*

Seitz, C. [1985]. “The Cosmic Cube,” *Comm. ACM* 28:1 (January), 22–31.

*A tutorial article on a parallel processor connected via a hypertree. The Cosmic Cube is the ancestor of the Intel supercomputers.*

Slotnick, D. L. [1982]. “The conception and development of parallel processors—a personal memoir,” *Annals of the History of Computing* 4:1 (January), 20–30.

*Recollections of the beginnings of parallel processing by the architect of the Illiac I V.*

Williams, S., A. Waterman, and D. Patterson [2009]. “Roofline: An insightful visual performance model for multicore architectures,” *Communications of the ACM*, 52:4 (April), 65–76.

Williams, S., J. Carter, L. Oliker, J. Shalf, and K. Yelick [2008]. “Lattice Boltzmann simulation optimization on leading multicore platforms,” *International Parallel & Distributed Processing Symposium (IPDPS)*.

*Paper containing the results of the four multicores for LBMHD.*

Williams, S., L. Oliker, R. Vuduc, J. Shalf, K. Yelick, and J. Demmel [2007]. “Optimization of sparse matrix-vector multiplication on emerging multicore platforms,” *Supercomputing (SC)*.

*Paper containing the results of the four multicores for SPmV.*

Williams, S. [2008]. *Autotuning Performance of Multicore Computers*, Ph.D. Dissertation, U.C. Berkeley.

*Dissertation containing the roofline model.*

Woo, S. C., M. Ohara, E. Torrie, J. P. Singh, and A. Gupta. “The SPLASH-2 programs: characterization and methodological considerations,” *Proceedings of the 22nd Annual International Symposium on Computer Architecture (ISCA '95)*, May, 24–36.

*Paper describing the second version of the Stanford parallel benchmarks.*

## Appendix A

Aho, A., R. Sethi, and J. Ullman [1985]. *Compilers: Principles, Techniques, and Tools*, Reading, MA: Addison-Wesley.

*Slightly dated and lacking in coverage of modern architectures, but still the standard reference on compilers.*

Sweetman, D. [1999]. *See MIPS Run*, San Francisco, CA: Morgan Kaufmann Publishers.

*A complete, detailed, and engaging introduction to the MIPS instruction set and assembly language programming on these machines.*

Detailed documentation on the MIPS-32 architecture is available on the Web:

MIPS32™ Architecture for Programmers Volume I: Introduction to the MIPS32™ Architecture (<http://mips.com/content/Documentation/MIPSDocumentation/>)

[ProcessorArchitecture/ArchitectureProgrammingPublicationsforMIPS32/MD00082-2B-MIPS32INT-AFP-02.00.pdf/getDownload](http://mips.com/content/Documentation/MIPSDocumentation/ProcessorArchitecture/ArchitectureProgrammingPublicationsforMIPS32/MD00082-2B-MIPS32INT-AFP-02.00.pdf/getDownload))

MIPS32™ Architecture for Programmers Volume II: The MIPS32™ Instruction Set (<http://mips.com/content/Documentation/MIPSDocumentation/ProcessorArchitecture/ArchitectureProgrammingPublicationsforMIPS32/MD00086-2B-MIPS32BIS-AFP-02.00.pdf/getDownload>)

MIPS32™ Architecture for Programmers Volume III: The MIPS32™ Privileged Resource Architecture (<http://mips.com/content/Documentation/MIPSDocumentation/ProcessorArchitecture/ArchitectureProgrammingPublicationsforMIPS32/MD00090-2B-MIPS32PRA-AFP-02.00.pdf/getDownload>)

## Appendix B

There are a number of good texts on logic design. Here are some you might like to look into.

Ashenden, P. [2007]. *Digital Design: An Embedded Systems Approach Using VHDL/Verilog*, Waltham, MA: Morgan Kaufmann.

Ciletti, M. D. [2002]. *Advanced Digital Design with the Verilog HDL*, Englewood Cliffs, NJ: Prentice Hall.

*A thorough book on logic design using Verilog.*

Harris, D. and S. Harris [2012]. *Digital Design and Computer Architecture*, Waltham, MA: Morgan Kaufmann.

*A unique and modern approach to digital design using VHDL and SystemVerilog.*

Katz, R. H. [2004]. *Modern Logic Design*, 2nd ed., Reading, MA: Addison- Wesley.

*A general text on logic design.*

Wakerly, J. F. [2000]. *Digital Design: Principles and Practices*, 3rd ed., Englewood Cliffs, NJ: Prentice Hall.

*A general text on logic design.*

## Appendix C

Akeley, K. and T. Jermoluk [1988]. “High-Performance Polygon Rendering,” *Proc. SIGGRAPH 1988* (August), 239–46.

Akeley, K. [1993]. “RealityEngine Graphics.” *Proc. SIGGRAPH 1993* (August), 109–16.

Blelloch, G. B. [1990]. “Prefix Sums and Their Applications.” In John H. Reif (Ed.), *Synthesis of Parallel Algorithms*, Morgan Kaufmann Publishers, San Francisco.

Blythe, D. [2006]. “The Direct3D 10 System,” *ACM Trans. Graphics*, Vol. 25, no. 3 (July), 724–34.

- Buck, I., T. Foley, D. Horn, J. Sugerman, K. Fatahian, M. Houston, and P. Hanrahan [2004]. “Brook for GPUs: Stream Computing on Graphics Hardware.” *Proc. SIGGRAPH 2004*, 777–86, August. <http://doi.acm.org/10.1145/1186562.1015800>
- Elder, G. [2002] “Radeon 9700.” Eurographics/SIGGRAPH Workshop on Graphics Hardware, Hot3D Session, [www.graphicshardware.org/previous/www\\_2002/presentations/Hot3D-RADEON9700.ppt](http://www.graphicshardware.org/previous/www_2002/presentations/Hot3D-RADEON9700.ppt)
- Fernando, R. and M. J. Kilgard [2003]. *The Cg Tutorial: The Definitive Guide to Programmable Real-Time Graphics*, Addison-Wesley, Reading, MA.
- Fernando, R. ed. [2004]. *GPU Gems: Programming Techniques, Tips, and Tricks for Real-Time Graphics*, Addison-Wesley, Reading, MA. [http://developer.nvidia.com/object/gpu\\_gems\\_home.html](http://developer.nvidia.com/object/gpu_gems_home.html).
- Foley, J., A. van Dam, S. Feiner, and J. Hughes [1995]. *Computer Graphics: Principles and Practice, second edition in C*, Addison-Wesley, Reading, MA.
- Hillis, W. D. and G. L. Steele [1986]. “Data parallel algorithms.” *Commun. ACM* 29, 12 (Dec.), 1170–83. <http://doi.acm.org/10.1145/7902.7903>.
- IEEE 754R Working Group [2006]. *DRAFT Standard for Floating-Point Arithmetic P754*. [www.validlab.com/754R/drafts/archive/2006-10-04.pdf](http://www.validlab.com/754R/drafts/archive/2006-10-04.pdf).
- Industrial Light and Magic [2003]. *OpenEXR*, [www.openexr.com](http://www.openexr.com).
- Intel Corporation [2007]. *Intel 64 and IA-32 Architectures Optimization Reference Manual*. November. Order Number: 248966-016. Also: [www3.intel.com/design/processor/manuals/248966.pdf](http://www3.intel.com/design/processor/manuals/248966.pdf).
- Kessenich, J. [2006]. *The OpenGL Shading Language, Language Version 1.20, Sept. 2006*. [www.opengl.org/documentation/specs/](http://www.opengl.org/documentation/specs/).
- Kirk, D. and D. Voorhies [1990]. “The Rendering Architecture of the DN10000VS.” *Proc. SIGGRAPH 1990* (August), 299–307.
- Lindholm E., M. J. Kilgard, and H. Moreton [2001]. “A User- Programmable Vertex Engine.” *Proc. SIGGRAPH 2001* (August), 149–58.
- Lindholm E., J. Nickolls, S. Oberman, and J. Montrym [2008]. “NVIDIA Tesla: A Unified Graphics and Computing Architecture.” *IEEE Micro*, Vol. 28, no. 2 (March–April), 39–55.
- Microsoft Corporation. Microsoft DirectX Specification, <http://msdn.microsoft.com/directx/>
- Microsoft Corporation. [2003]. *Microsoft DirectX 9 Programmable Graphics Pipeline*, Microsoft Press, Redmond, WA.
- Montrym, J., D. Baum, D. Dignam, and C. Migdal [1997]. “InfiniteReality: A Real-Time Graphics System.” *Proc. SIGGRAPH 1997* (August), 293–301.

Montrym, J. and H. Moreton [2005]. “The GeForce 6800,” *IEEE Micro*, Vol. 25, no. 2 (March–April), 41–51.

Moore, G. E. [1965]. “Cramming more components onto integrated circuits,” *Electronics*, Vol. 38, no. 8 (April 19).

Nguyen, H., ed. [2008]. *GPU Gems 3*, Addison-Wesley, Reading, MA.

Nickolls, J., I. Buck, M. Garland, and K. Skadron [2008]. “Scalable Parallel Programming with CUDA,” *ACM Queue*, Vol. 6, no. 2 (March–April) 40–53.

NVIDIA [2007]. CUDA Zone. [www.nvidia.com/CUDA](http://www.nvidia.com/CUDA)

NVIDIA [2007]. *CUDA Programming Guide 1.1*. [http://developer.download.nvidia.com/compute/cuda/1\\_1/NVIDIA\\_CUDA\\_Programming\\_Guide\\_1.1.pdf](http://developer.download.nvidia.com/compute/cuda/1_1/NVIDIA_CUDA_Programming_Guide_1.1.pdf).

NVIDIA [2007]. *PTX: Parallel Thread Execution ISA version 1.1*. [www.nvidia.com/object/io\\_1195170102263.html](http://www.nvidia.com/object/io_1195170102263.html).

Nyland, L., M. Harris, and J. Prins [2007]. “Fast N-Body Simulation with CUDA.” In *GPU Gems 3*, H. Nguyen (Ed.), Addison-Wesley, Reading, MA.

Oberman, S. F. and M. Y. Siu [2005]. “A High-Performance Area- Efficient Multifunction Interpolator,” *Proc. Seventeenth IEEE Symp. Computer Arithmetic*, 272–79.

Pharr, M. ed. [2005]. *GPU Gems 2: Programming Techniques for High-Performance Graphics and General-Purpose Computation*, Addison-Wesley, Reading, MA.

Satish, N., M. Harris, and M. Garland [2008]. “Designing Efficient Sorting Algorithms for Manycore GPUs,” NVIDIA Technical Report NVR-2008-001.

Segal, M. and K. Akeley [2006]. *The OpenGL Graphics System: A Specification, Version 2.1, Dec. 1, 2006*. [www.opengl.org/documentation/specs/](http://www.opengl.org/documentation/specs/).

Sengupta, S., M. Harris, Y. Zhang, and J. D. Owens [2007]. “Scan Primitives for GPU Computing.” In *Proc. of Graphics Hardware 2007* (August), 97–106.

Volkov, V and J. Demmel [2008]. “LU, QR and Cholesky Factorizations using Vector Capabilities of GPUs,” Technical Report No. UCB/EECS-2008-49, 1–11. [www.eecs.berkeley.edu/Pubs/TechRpts/2008/EECS-2008-49.html](http://www.eecs.berkeley.edu/Pubs/TechRpts/2008/EECS-2008-49.html).

Williams, S., L. Oliker, R. Vuduc, J. Shalf, K. Yelick, and J. Demmel [2007]. “Optimization of sparse matrix-vector multiplication on emerging multicore platforms,” In *Proc. Supercomputing 2007*, November.

## Appendix E

Bhandarkar, D. P. [1995]. *Alpha Architecture and Implementations*, New ton, MA: Digital Press.

Darcy, J. D., and D. Gay [1996]. “FLECKmarks: Measuring floating point performance using a compliant arithmetic benchmark,” CS 252 class project, U.C Berkeley (see [HTTP:CS.Berkeley.EDU/~darcy/Projects/cs252/](http://CS.Berkeley.EDU/~darcy/Projects/cs252/)).

Digital Semiconductor [1996]. *Alpha Architecture Handbook*, Version 3, Maynard, MA: Digital Press, Order number EC-QD2KB-TE (October).

Furber, S. B. [1996]. *ARM System Architecture*, Harlow, England: Addison-Wesley. (See [www.cs.man.ac.uk/amulet/publications/books/ARMSysArch.](http://www.cs.man.ac.uk/amulet/publications/books/ARMSysArch.))

Hewlett-Packard [1994]. *PA-RISC 2.0 Architecture Reference Manual*, 3rd ed.

Hitachi [1997]. *SuperH RISC Engine SH7700 Series Programming Manual*. (See [www.hal.sp.hitachi.com/tech\\_prod/](http://www.hal.sp.hitachi.com/tech_prod/) and search for title.)

IBM [1994]. *The PowerPC Architecture*, San Francisco: Morgan Kaufmann.

Kane, G. [1996]. *PA-RISC 2.0 Architecture*, Upper Saddle River, NJ: Prentice Hall PTR.

Kane, G., and J. Heinrich [1992]. *MIPS RISC Architecture*, Englewood Cliffs, NJ: Prentice Hall.

Kissell, K. D. [1997]. *MIPS16: High-Density for the Embedded Market*. (See [www.sgi.com/MIPS/arch/MIPS16/MIPS16.whitepaper.pdf](http://www.sgi.com/MIPS/arch/MIPS16/MIPS16.whitepaper.pdf).)

Magenheimer, D. J., L. Peters, K. W. Pettis, and D. Zuras [1988]. “Integer multiplication and division on the HP precision architecture,” *IEEE Trans. on Computers* 37:8, 980–90.

MIPS [1997]. *MIPS16 Application Specific Extension Product Description*. (See [www.sgi.com/MIPS/arch/MIPS16/mips16.pdf](http://www.sgi.com/MIPS/arch/MIPS16/mips16.pdf).)

Mitsubishi [1996]. *Mitsubishi 32-Bit Single Chip Microcomputer M32R Family Software Manual* (September).

Muchnick, S. S. [1988]. “Optimizing compilers for SPARC,” *Sun Technology* 1:3 (Summer), 64–77.

Seal, D. *Arm Architecture Reference Manual*, 2nd ed, Morgan Kaufmann, 2000.

Silicon Graphics [1996]. *MIPS V Instruction Set*. (See [www.sgi.com/MIPS/arch/ISA5/#MIPSV\\_idx](http://www.sgi.com/MIPS/arch/ISA5/#MIPSV_idx).)

Sites, R. L., and R. Witek (eds.) [1995]. *Alpha Architecture Reference Manual*, 2nd ed. Newton, MA: Digital Press.

Sloss, A. N., D. Symes, and C. Wright, *ARM System Developer’s Guide*, San Francisco: Elsevier Morgan Kaufmann, 2004.

Sun Microsystems [1989]. *The SPARC Architectural Manual*, Version 8, Part No. 800-1399-09, August 25.

Sweetman, D. *See MIPS Run*, 2nd ed, Morgan Kaufmann, 2006.

---

Taylor, G., P. Hilfinger, J. Larus, D. Patterson, and B. Zorn [1986]. “Evaluation of the SPUR LISP architecture,” *Proc. 13th Symposium on Computer Architecture* (June), Tokyo.

Ungar, D., R. Blau, P. Foley, D. Samples, and D. Patterson [1984]. “Architecture of SOAR: Smalltalk on a RISC,” *Proc. 11th Symposium on Computer Architecture* (June), Ann Arbor, MI, 188–97.

Weaver, D. L., and T. Germond [1994]. *The SPARC Architectural Manual*, Version 9, Englewood Cliffs, NJ: Prentice Hall.

Weiss, S., and J. E. Smith [1994]. *Power and PowerPC*, San Francisco: Morgan Kaufmann.
